# Supplementary material for: Palmitoleate Protects against Zika Virus-Induced Placental Trophoblast Apoptosis
Source: MDPI journal article supplement (doi:10.3390/biomedicines9060643), 2021-06-04
Supplement: s1 [file s1]

# Supplementary Material

Supplementary Figure 1

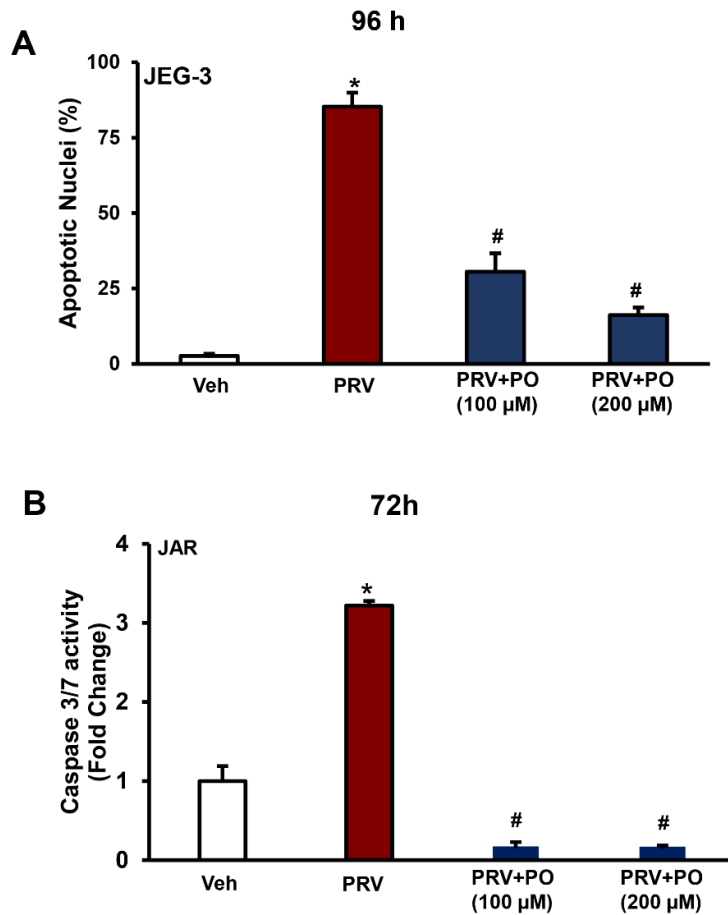

**Figure S1.** (A) Increase in percentage of apoptotic nuclei in JEG-3 cells infected with 1.0 MOI PRV 96hpi when compared to uninfected vehicle cells. On treatment with 100–200  $\mu$ M palmitoleate post-infection, there was significant reduction in the percent apoptotic nuclei. (B) Similarly, there was significant upregulation of caspase 3/7 in 1.0MOI PRV infected JAR cells when compared to uninfected vehicle cells, but this was significantly downregulated when the cells were treated with 100–200  $\mu$ M palmitoleate post-infection. Data represent mean  $\pm$  SEM,  $n = 3$ . \* $p < 0.05$  compared to uninfected vehicles cells, #  $P < 0.05$  compared ZIKV infected cells.

## Supplementary Figure-2

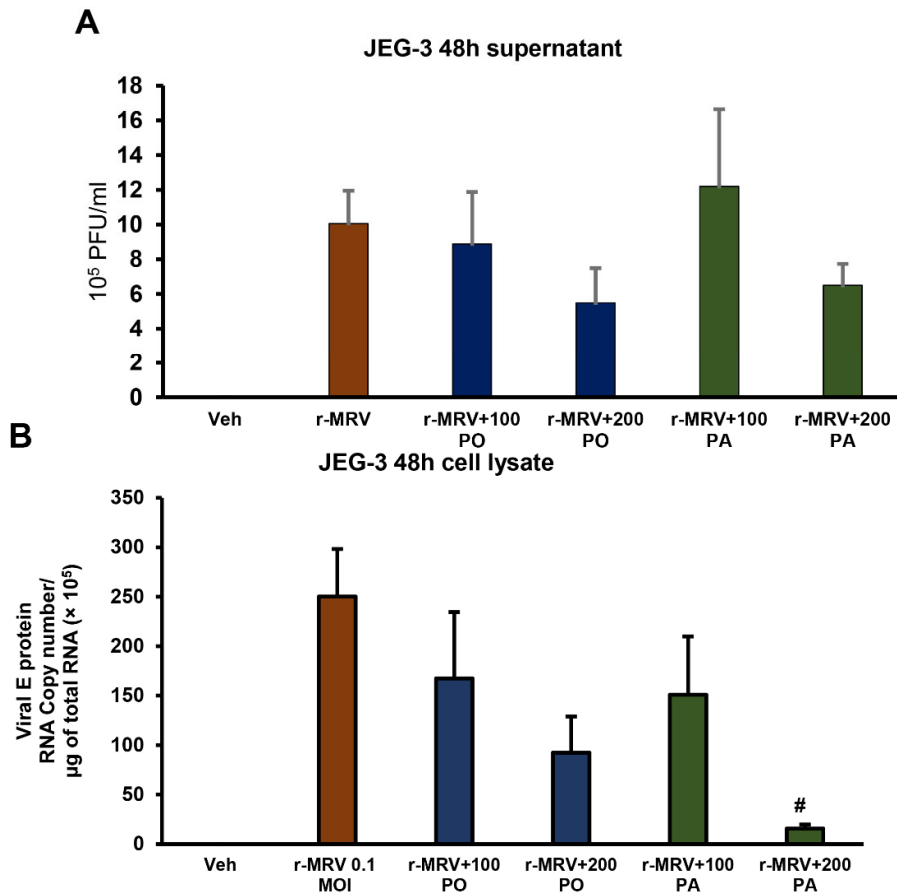

**Figure S2.** (A) Plaque assay using cell culture supernatant showed a trend in decreased pfu/ml in 200 µM palmitoleate treated +ZIKV infected cells. Similarly, 100 µM palmitate cells for 48 h with 0.1 MOI r-MRV showed a trend towards increase in pfu/ml, but, in contrast, 200 µM of palmitate treatment showed a trend towards reduction in pfu/ml. Data represent mean ± SEM,  $n = 3$ .  $\#p < 0.05$  compared ZIKV infected cells. (B) Similarly, the viral envelope copy number in cell lysate with 200 µM of palmitoleate treatment showed a trend towards reduction when compared to 0.1 MOI r-MRV infected cells alone, but 200 µM of palmitate-treated cells showed a significant reduction in the viral envelope RNA copy number 48 hpi. Data represent mean ± SEM,  $n = 3$ .  $\#p < 0.05$  compared to ZIKV infected cells.
